# Supplementary material
Source: PubMed Central journal article supplement (PMC3039360)

**Lakhal et al**  
**Supplementary data**

**Supplementary figure 1:**

HJV-Hep3B cells were treated according to the described schedule either in normoxia or hypoxia (**Supp 1A**). Cycloheximide was added to inhibit *de novo* protein synthesis and levels of the short-lived protein p27 were measured to confirm the efficacy of the cycloheximide treatment. Immunoblot analysis of total HJV and p27 protein levels are shown for the indicated timepoints in normoxia (**Supp 1B**) and hypoxia (**Supp 1C**).  $\beta$ -Actin levels were measured to correct for loading differences. Signal intensities for HJV and p27 were quantified by densitometer, normalized to  $\beta$ -Actin, and then plotted for the indicated timepoints (**Supp1D & 1E**). Using the exponential decay function in Excel, HJV protein half life was calculated at ~5.8h both in normoxia and in hypoxia

**Supplementary figure 2:**

Genomic sequence of human hepcidin promoter showing 140-bp region upstream of TSS with BRE and STAT3 sites indicated. Side-directed mutagenesis of BRE and STAT3 sites is shown (**Supp2A**). WT-Hep3B cells were transfected with one of the luciferase vectors (wtBRE, mutBRE) in combination with control siRNA or HJV siRNA. Levels of luciferase signal were then measured after 48 hours (**Supp1B**) (\* $p < 0.001$  using Bonferroni's post-test analysis of one-way ANOVA). WT-Hep3B cells were transfected with one of the luciferase vectors wtBRE (**Supp2C**), mutBRE (**Supp2D**) or CA9-HRE (**Supp2E**) in combination with control siRNA, TMPRSS6 siRNA or combined HIF-1 & -2 $\alpha$  siRNA. Levels of the luciferase signal were then measured after 48h of normoxia or hypoxia (0.5% O<sub>2</sub>) (\* $p < 0.001$  using Bonferroni's post-test analysis of one-way ANOVA). Luciferase signal was normalized to  $\beta$ -galactosidase signal to correct for transfection efficiency.

**Supplementary figure 3:**

HJV-Hep3B cells were transfected with one of the luciferase vectors wtBRE (**Supp3A**), hepc.prom-2.4kb (**Supp 3B**) or CA9-HRE (**Supp 3C**) in combination with control siRNA, TMPRSS6 siRNA or combined HIF-1 & -2 $\alpha$  siRNA. Luciferase activity was then measured after 48h of normoxia or hypoxia (0.5% O<sub>2</sub>) (\* $p < 0.001$  using Bonferroni's post-test analysis of one-way ANOVA). Luciferase signal was normalized to  $\beta$ -galactosidase signal to correct for transfection efficiency.

**Supplementary figure 4:**

Histogram analysis of mHJV (**Supp 4A**) and GFP (**Supp 4B**) expression in HJV-Hep3B pre-transfected with control siRNA, or furin siRNA prior to hypoxia. HJV-Hep3B cells were transfected with the luciferase vector wtBRE (**supp 4C**) or mutBRE (**supp 4D**) in combination with control siRNA, TMPRSS6 siRNA, Furin siRNA or combined TMPRSS6 and Furin siRNA. Levels of the luciferase signal were then measured after 48h of normoxia or hypoxia (0.5% O<sub>2</sub>). Luciferase signal was normalized to  $\beta$ -galactosidase signal to correct for transfection efficiency. (\* $p < 0.001$  using Bonferroni's post-test analysis of one-way ANOVA).

### Supplementary figure 1:

A

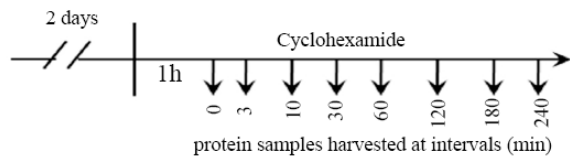

B

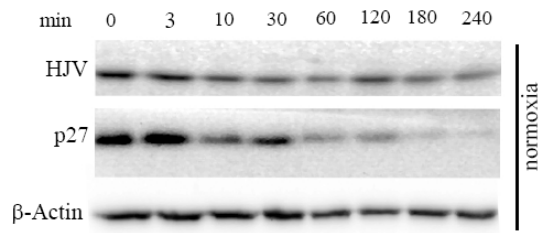

C

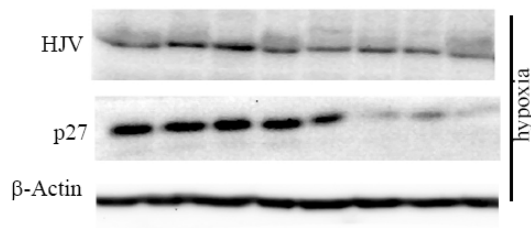

D

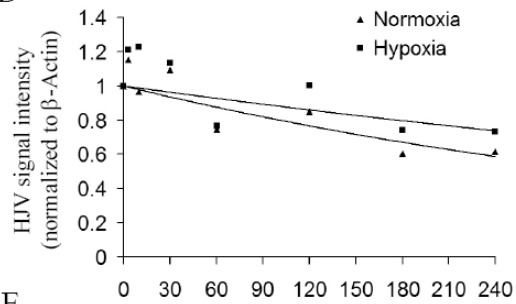

E

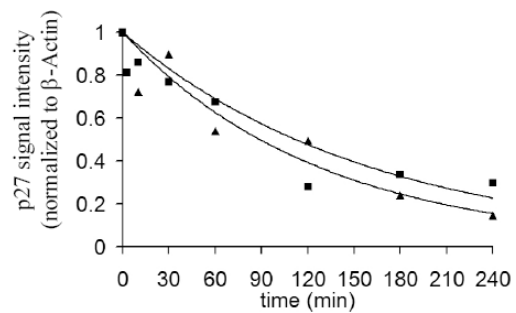

**Supplementary figure 2:**

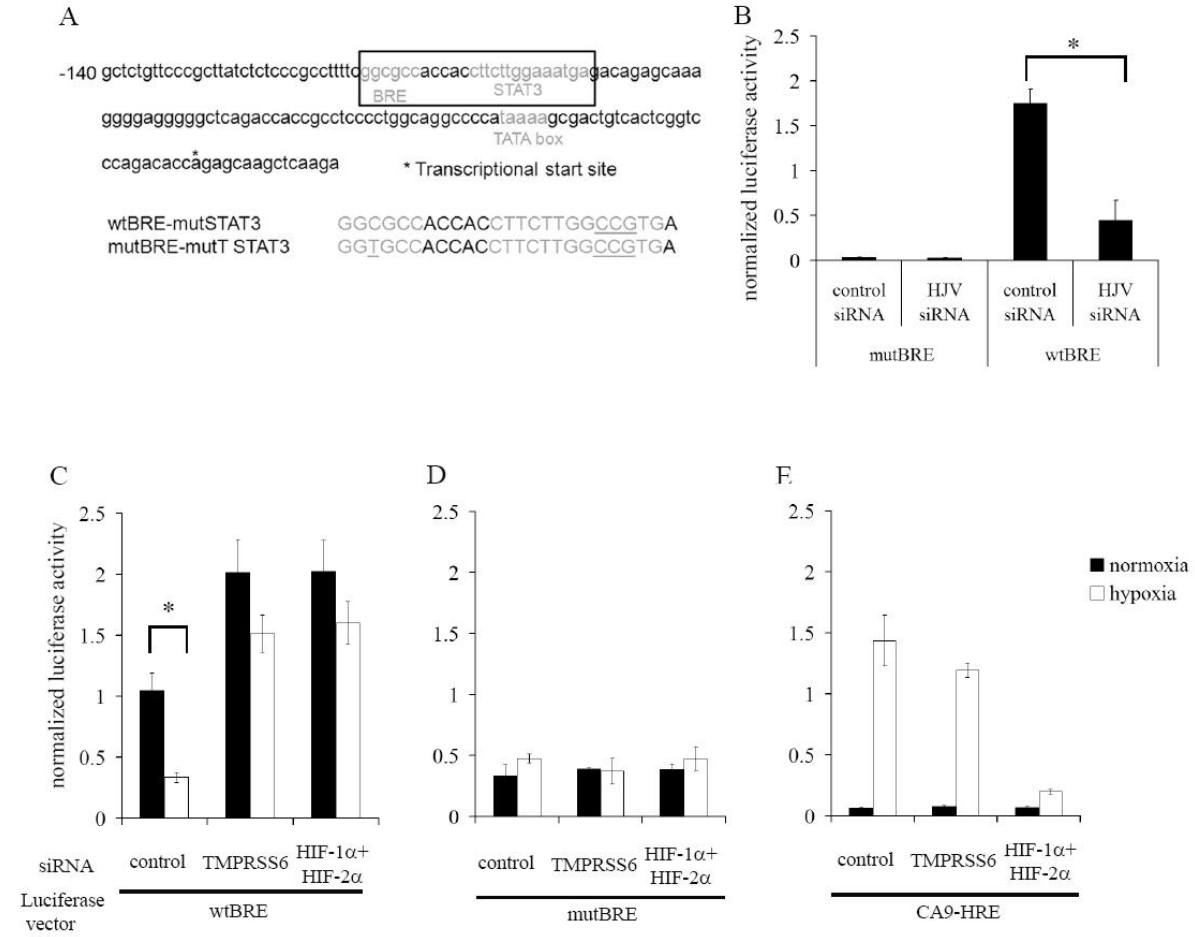

### Supplementary figure 3:

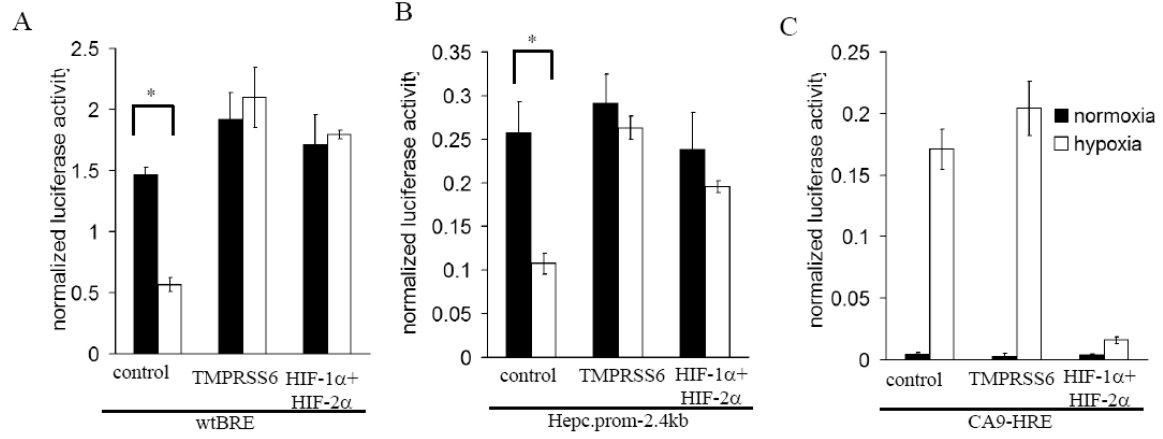

**Supplementary figure 4:**

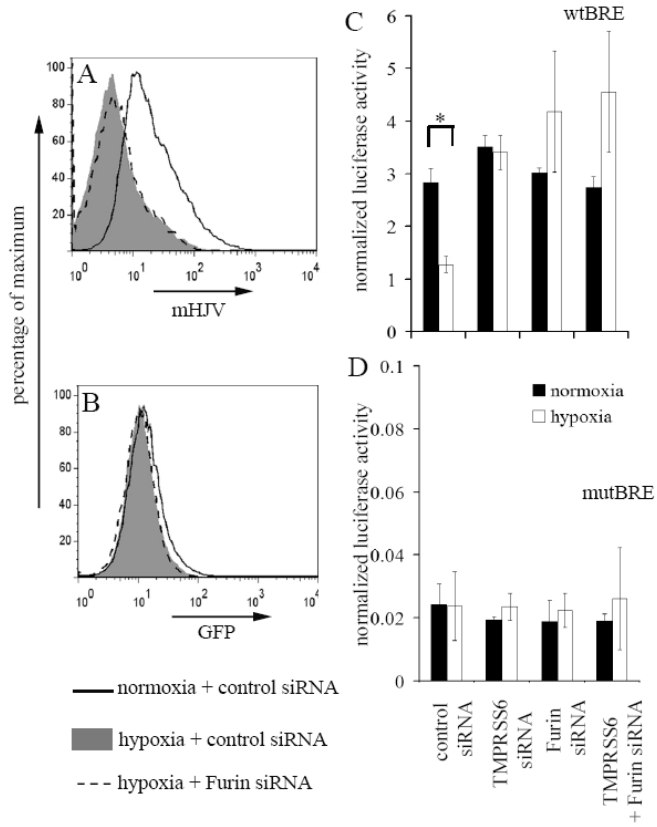

Supplement: supp_M110.173096_jbc.M110.173096-1.pdf [file supp_M110.173096_jbc.M110.173096-1.pdf]
